# Supplementary material
Source: publisher site journal article supplement (https://www.dovepress.com/article/256320)
Supplement: Supplementary file 1 [file get_supplementary_file.php]

**Table S1. The *mcr* genes selected for DNA synthesis**

| **Gene** | **NCBI reference sequence** |
| --- | --- |
| *mcr-1.1* | NG_050417.1 |
| *mcr-2.1* | NG_051171.1 |
| *mcr-3.1* | NG_055505.1 |
| *mcr-4.1* | NG_057470.1 |
| *mcr-5.1* | NG_055658.1 |
| *mcr-7.1* | NG_056413.1 |
| *mcr-8.1* | NG_061399.1 |
| *mcr-9.1* | NG_064792.1 |

**Table S2. Mixed DNA templates**

| 28 combinations of two genes | | | |
| --- | --- | --- | --- |
| *mcr-1/mcr-2* | *mcr-1/mcr-3* | *mcr-1/mcr-4* | *mcr-1/mcr-5* |
| *mcr-1/mcr-7* | *mcr-1/mcr-8* | *mcr-1/mcr-9* | *mcr-2/mcr-3* |
| *mcr-2/mcr-4* | *mcr-2/mcr-5* | *mcr-2/mcr-7* | *mcr-2/mcr-8* |
| *mcr-2/mcr-9* | *mcr-3/mcr-4* | *mcr-3/mcr-5* | *mcr-3/mcr-7* |
| *mcr-3/mcr-8* | *mcr-3/mcr-9* | *mcr-4/mcr-5* | *mcr-4/mcr-7* |
| *mcr-4/mcr-8* | *mcr-4/mcr-9* | *mcr-5/mcr-7* | *mcr-5/mcr-8* |
| *mcr-5/mcr-9* | *mcr-7/mcr-8* | *mcr-7/mcr-9* | *mcr-8/mcr-9* |

| 56 combinations of three genes | | | |
| --- | --- | --- | --- |
| *mcr-1/mcr-2/mcr-3* | *mcr-1/mcr-2/mcr-4* | *mcr-1/mcr-2/mcr-5* | *mcr-1/mcr-2/mcr-7* |
| *mcr-1/mcr-2/mcr-8* | *mcr-1/mcr-2/mcr-9* | *mcr-1/mcr-3/mcr-4* | *mcr-1/mcr-3/mcr-5* |
| *mcr-1/mcr-3/mcr-7* | *mcr-1/mcr-3/mcr-8* | *mcr-1/mcr-3/mcr-9* | *mcr-1/mcr-4/mcr-5* |
| *mcr-1/mcr-4/mcr-7* | *mcr-1/mcr-4/mcr-8* | *mcr-1/mcr-4/mcr-9* | *mcr-1/mcr-5/mcr-7* |
| *mcr-1/mcr-5/mcr-8* | *mcr-1/mcr-5/mcr-9* | *mcr-1/mcr-7/mcr-8* | *mcr-1/mcr-7/mcr-9* |
| *mcr-1/mcr-8/mcr-9* | *mcr-2/mcr-3/mcr-4* | *mcr-2/mcr-3/mcr-5* | *mcr-2/mcr-3/mcr-7* |
| *mcr-2/mcr-3/mcr-8* | *mcr-2/mcr-3/mcr-9* | *mcr-2/mcr-4/mcr-5* | *mcr-2/mcr-4/mcr-7* |
| *mcr-2/mcr-4/mcr-8* | *mcr-2/mcr-4/mcr-9* | *mcr-2/mcr-5/mcr-7* | *mcr-2/mcr-5/mcr-8* |
| *mcr-2/mcr-5/mcr-9* | *mcr-2/mcr-7/mcr-8* | *mcr-2/mcr-7/mcr-9* | *mcr-2/mcr-8/mcr-9* |
| *mcr-3/mcr-4/mcr-5* | *mcr-3/mcr-4/mcr-7* | *mcr-3/mcr-4/mcr-8* | *mcr-3/mcr-4/mcr-9* |
| *mcr-3/mcr-5/mcr-7* | *mcr-3/mcr-5/mcr-8* | *mcr-3/mcr-5/mcr-9* | *mcr-3/mcr-7/mcr-8* |
| *mcr-3/mcr-7/mcr-9* | *mcr-3/mcr-8/mcr-9* | *mcr-4/mcr-5/mcr-7* | *mcr-4/mcr-5/mcr-8* |
| *mcr-4/mcr-5/mcr-9* | *mcr-4/mcr-7/mcr-8* | *mcr-4/mcr-7/mcr-9* | *mcr-4/mcr-8/mcr-9* |
| *mcr-5/mcr-7/mcr-8* | *mcr-5/mcr-7/mcr-9* | *mcr-5/mcr-8/mcr-9* | *mcr-7/mcr-8/mcr-9* |

**Table S3. Bacterial isolates tested in the multiplex PCR assay**

| **Name** | **Species** | **Hosts** | **Origins** | **Multiplex PCR results** |
| --- | --- | --- | --- | --- |
| NEPC0101 | *E. coli* | Swine | Jilin, China | Negative |
| NEPC0102 | *E. coli* | Swine | Jilin, China | Negative |
| NEPC0302 | *E. coli* | Swine | Jilin, China | Negative |
| NEPC0303 | *E. coli* | Swine | Jilin, China | Negative |
| NEPC0801 | *E. coli* | Swine | Jilin, China | Negative |
| NEPC0802 | *E. coli* | Swine | Jilin, China | Negative |
| NEPC1001 | *E. coli* | Swine | Jilin, China | Negative |
| NEPC1401 | *E. coli* | Swine | Jilin, China | Negative |
| NEPC1402 | *E. coli* | Swine | Jilin, China | Negative |
| NEPC1702 | *E. coli* | Swine | Jilin, China | Negative |
| NEPC1703 | *E. coli* | Swine | Jilin, China | Negative |
| NEPC2101 | *E. coli* | Swine | Jilin, China | Negative |
| NEPC2102 | *E. coli* | Swine | Jilin, China | *mcr-1* |
| NEPC2201 | *E. coli* | Swine | Jilin, China | *mcr-1* |
| NEPC2202 | *E. coli* | Swine | Jilin, China | Negative |
| NEPC2802 | *E. coli* | Swine | Jilin, China | Negative |
| NEPC2803 | *E. coli* | Swine | Jilin, China | Negative |
| NEPC3003 | *E. coli* | Swine | Jilin, China | Negative |
| NKPC0103 | *K. pneumoniae* | Swine | Jilin, China | Negative |
| NKPC0301 | *K. pneumoniae* | Swine | Jilin, China | *mcr-1* |
| NKPC0803 | *K. pneumoniae* | Swine | Jilin, China | Negative |
| NKPC1002 | *K. pneumoniae* | Swine | Jilin, China | *mcr-3* |
| NKPC1003 | *K. pneumoniae* | Swine | Jilin, China | Negative |
| NKPC1403 | *K. pneumoniae* | Swine | Jilin, China | Negative |
| NKPC1701 | *K. pneumoniae* | Swine | Jilin, China | *mcr-1* |
| NKPC2103 | *K. pneumoniae* | Swine | Jilin, China | Negative |
| NKPC2203 | *K. pneumoniae* | Swine | Jilin, China | Negative |
| NKPC2801 | *K. pneumoniae* | Swine | Jilin, China | Negative |
| NKPC3001 | *K. pneumoniae* | Swine | Jilin, China | *mcr-1* |
| NKPC3002 | *K. pneumoniae* | Swine | Jilin, China | *mcr-1* |
| DEPC0115 | *E. coli* | Pet dog | Jilin, China | Negative |
| DEPC0116 | *E. coli* | Pet dog | Jilin, China | Negative |
| DEPC0304 | *E. coli* | Pet dog | Jilin, China | *mcr-1* |
| DEPC0311 | *E. coli* | Pet dog | Jilin, China | *mcr-1* |
| DEPC0312 | *E. coli* | Pet dog | Jilin, China | Negative |
| DEPC0245 | *E. coli* | Pet dog | Jilin, China | *mcr-1* |
| DEPC0261 | *E. coli* | Pet dog | Jilin, China | *mcr-1* |
| DEPC1041 | *E. coli* | Pet dog | Jilin, China | *mcr-1* |
| DEPC1046 | *E. coli* | Pet dog | Jilin, China | Negative |
| DEPC0223 | *E. coli* | Pet dog | Jilin, China | *mcr-1* |
| DEPC2110 | *E. coli* | Pet dog | Jilin, China | Negative |
| DEPC2112 | *E. coli* | Pet dog | Jilin, China | *mcr-1* |
| DEPC0305 | *E. coli* | Pet dog | Jilin, China | *mcr-1* |
| DEPC0371 | *E. coli* | Pet dog | Jilin, China | Negative |
| CEPC0721 | *E. coli* | Pet cat | Jilin, China | Negative |
| CEPC0722 | *E. coli* | Pet cat | Jilin, China | Negative |
| CEPC2130 | *E. coli* | Pet cat | Jilin, China | *mcr-1* |
| CEPC0118 | *E. coli* | Pet cat | Jilin, China | Negative |
| CEPC0135 | *E. coli* | Pet cat | Jilin, China | Negative |
| CEPC1418 | *E. coli* | Pet cat | Jilin, China | *mcr-1* |
| CEPC1421 | *E. coli* | Pet cat | Jilin, China | Negative |
| CEPC0806 | *E. coli* | Pet cat | Jilin, China | Negative |
| CEPC0914 | *E. coli* | Pet cat | Jilin, China | Negative |
| CEPC0920 | *E. coli* | Pet cat | Jilin, China | *mcr-1* |
| CEPC1801 | *E. coli* | Pet cat | Jilin, China | *mcr-1* |
| DKPC1613 | *K. pneumoniae* | Pet dog | Jilin, China | Negative |
| DKPC2017 | *K. pneumoniae* | Pet dog | Jilin, China | Negative |
| DKPC2072 | *K. pneumoniae* | Pet dog | Jilin, China | *mcr-1* |
| DKPC0504 | *K. pneumoniae* | Pet dog | Jilin, China | Negative |
| CKPC1121 | *K. pneumoniae* | Pet cat | Jilin, China | Negative |

**Table S4. *In-silico* analysis of the primers for the amplification of *mcr* variants**

| **Gene** | **Genebank** | **Yes/No** |
| --- | --- | --- |
| *mcr-1.1* | KP347127.1 | Yes |
| *mcr-1.10* | MF176238.1 | Yes |
| *mcr-1.11* | KY853650.2 | Yes |
| *mcr-1.12* | LC337668.1 | Yes |
| *mcr-1.13* | MG384739.1 | Yes |
| *mcr-1.14* | KX443408.2 | Yes |
| *mcr-1.15* | MG763897.1 | Yes |
| *mcr-1.16* | MK568462.1 | Yes |
| *mcr-1.17* | MK568463.1 | Yes |
| *mcr-1.18* | PGLM01000025.1 | Yes |
| *mcr-1.19* | MK490674.1 | Yes |
| *mcr-1.2* | LXQO01000025.1 | Yes |
| *mcr-1.20* | LS398440.1 | Yes |
| *mcr-1.21* | MK965883.1 | Yes |
| *mcr-1.22* | MN017134.1 | Yes |
| *mcr-1.23* | MN873697.1 | Yes |
| *mcr-1.24* | MN879257.1 | Yes |
| *mcr-1.25* | MN879259.1 | Yes |
| *mcr-1.26* | JAAGSA010000042.1 | Yes |
| *mcr-1.27* | JAAGSB010000042.1 | Yes |
| *mcr-1.3* | KU934208.1 | Yes |
| *mcr-1.4* | KY041856.1 | Yes |
| *mcr-1.5* | KY283125.1 | Yes |
| *mcr-1.6* | KY352406.1 | Yes |
| *mcr-1.7* | KY488488.1 | Yes |
| *mcr-1.8* | KY683842.1 | Yes |
| *mcr-1.9* | KY964067.1 | Yes |
| *mcr-2.1* | LT598652.1 | Yes |
| *mcr-2.2* | MUYU01000015.1 | No |
| *mcr-2.3* | NQCO02000001.1 | Yes |
| *mcr-3.1* | KY924928.1 | Yes |
| *mcr-3.10* | MG214531.1 | Yes |
| *mcr-3.11* | MG489958.1 | Yes |
| *mcr-3.12* | MG564491.1 | Yes |
| *mcr-3.13* | MH332763.1 | Yes |
| *mcr-3.14* | MH332764.1 | Yes |
| *mcr-3.15* | MH332765.1 | Yes |
| *mcr-3.16* | MH332766.1 | Yes |
| *mcr-3.17* | MH332767.1 | Yes |
| *mcr-3.18* | MH332768.1 | Yes |
| *mcr-3.19* | NEFW01000046.1 | Yes |
| *mcr-3.2* | NPZH01000177.1 | Yes |
| *mcr-3.21* | MH371140.1 | Yes |
| *mcr-3.22* | NQCT02000005.1 | Yes |
| *mcr-3.23* | NQCZ01000032.1 | Yes |
| *mcr-3.24* | NQCB01000188.1 | Yes |
| *mcr-3.25* | PPTE01000085.1 | No |
| *mcr-3.26* | MH371139.1 | Yes |
| *mcr-3.27* | MH131694.1 | Yes |
| *mcr-3.28* | MH522717.1 | Yes |
| *mcr-3.29* | MK521074.1 | Yes |
| *mcr-3.3* | MF495680.1 | Yes |
| *mcr-3.30* | MH536730.1 | Yes |
| *mcr-3.4* | FLXA01000011.1 | Yes |
| *mcr-3.5* | MF489760.1 | Yes |
| *mcr-3.6* | MF598076.1 | Yes |
| *mcr-3.7* | MF598077.1 | Yes |
| *mcr-3.8* | MF598079.1 | Yes |
| *mcr-3.9* | MF598080.1 | Yes |
| *mcr-4.1* | MG459156.1 | Yes |
| *mcr-4.2* | MG459157.1 | Yes |
| *mcr-4.3* | MG026621.1 | Yes |
| *mcr-4.4* | MG822665.1 | Yes |
| *mcr-4.5* | MG822664.1 | Yes |
| *mcr-4.6* | MH423812.1 | Yes |
| *mcr-5.1* | KY807920.1 | Yes |
| *mcr-5.2* | MG384740.1 | Yes |
| *mcr-5.3* | MH062179.1 | Yes |
| *mcr-5.4* | MK965519.1 | Yes |
| *mcr-7.1* | MG267386.1 | Yes |
| *mcr-8.1* | MG736312.1 | Yes |
| *mcr-8.2* | MH638291.1 | Yes |
| *mcr-8.3* | MH598530.1 | Yes |
| *mcr-9.1* | MK791138.1 | Yes |


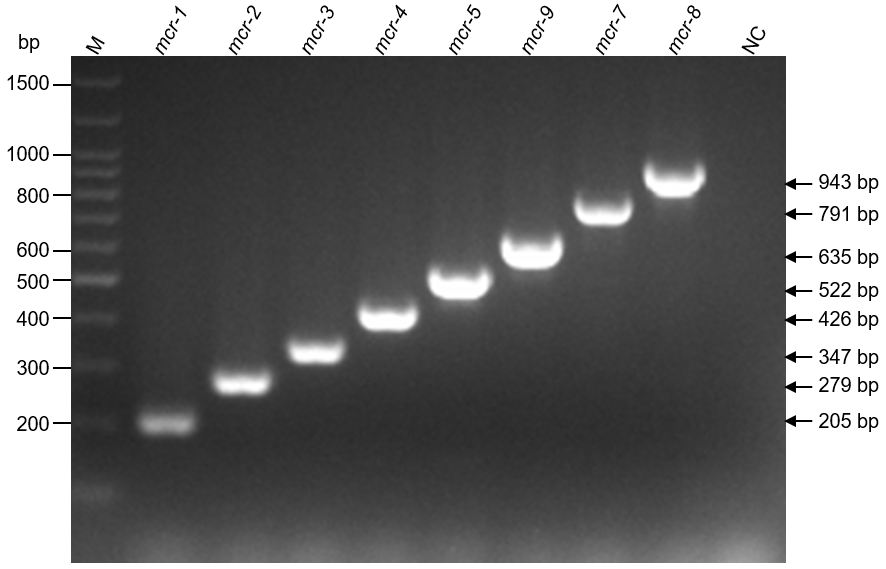


**Figure S1.** Multiplex PCR assay to detect *mcr* genes. Liquid cultures of *E. coli* strain Top10 carrying pUC57 with individual *mcr* genes were boiled and the resulting total DNA was added to the multiplex PCR. NC, *E. coli* TOP10 with empty vector pUC57. M shows the molecular size marker.


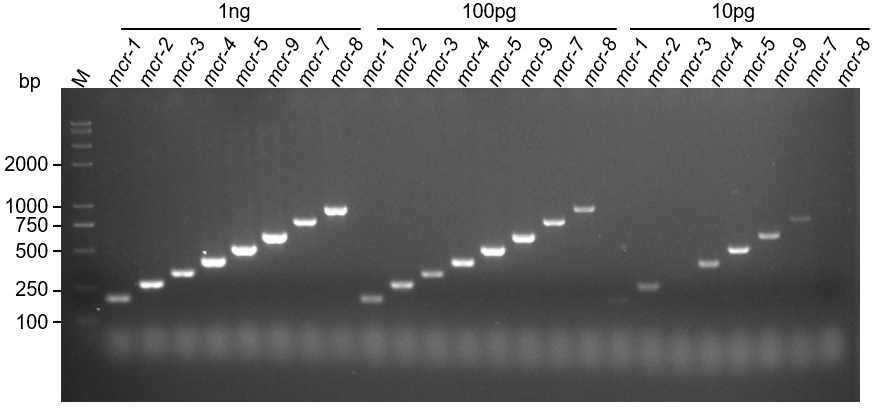


**Figure S2.** Detection limit of the multiplex PCR assay. Different amount of plasmid DNA containing relevant *mcr* genes were added to the multiplex PCR mixture. Amplicons were detected by the agarose gel electrophoresis. M indicates the molecular size marker.


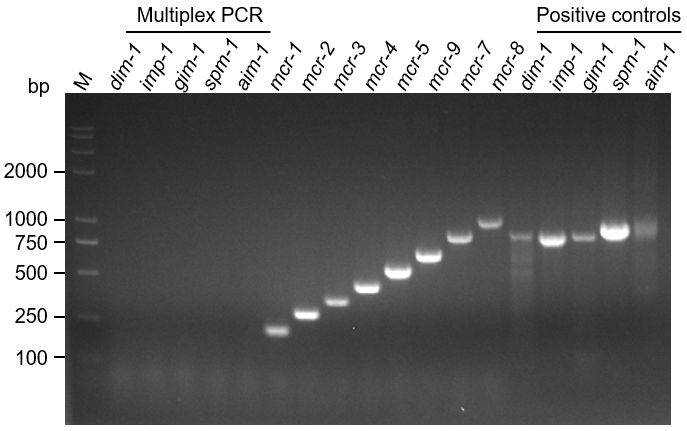


**Figure S3.** Cross-reactivity of the multiplex PCR method with the carbapenemase genes.The DNA sequences of *dim-1* (GenBank: KC004136.2), *imp-1* (GenBank: AJ223604.1), *spm-1* (GenBank: AJ492820.1), and *aim-1* (GenBank: AM998375.1) were synthesized by GenScript and cloned into pUC57. The plasmid DNA harboring relevant carbapenemase genes were used as templates in the multiplex PCR assay.
